# Supplementary material for: An autophagy-dependent tubular lysosomal network synchronizes degradative activity required for muscle remodeling
Source: Oxford University Press journal article supplement (doi:10.1242/jcs.248336), 2020-10-19
Supplement: jcs248336supp.pdf [file jcs248336supp.pdf]

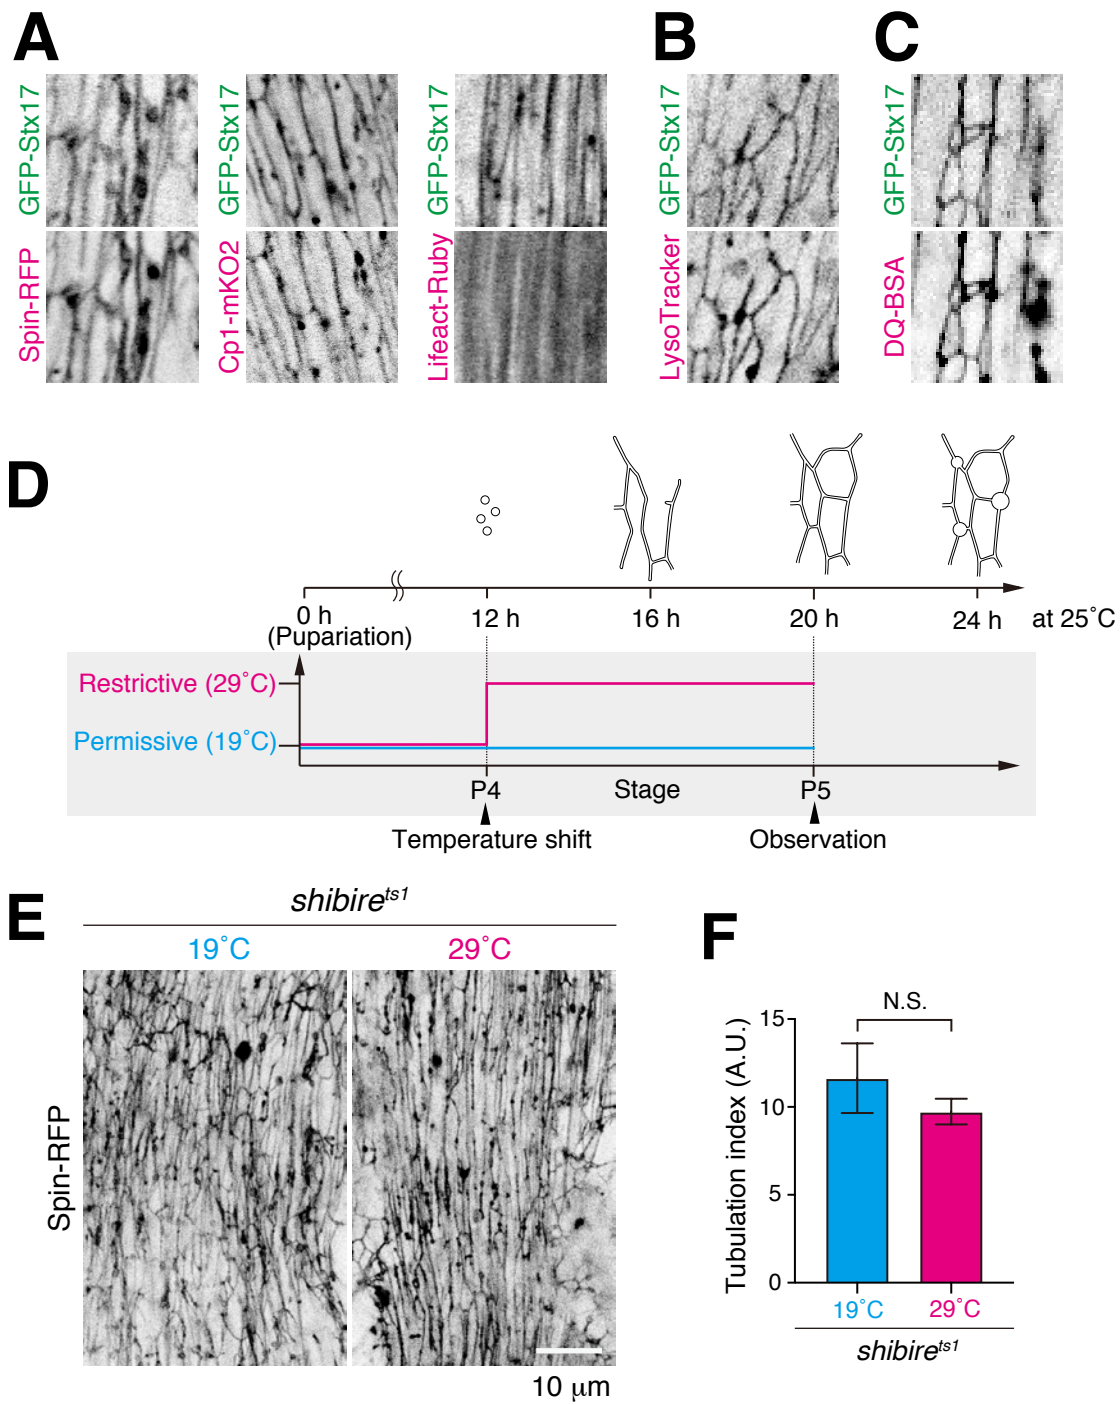

Figure S1

**Figure S1 Minimal effect of *shibire* disruption on tAL network formation**

(A) Colocalization between GFP–Stx17 and Spin–RFP, Cp1–mKO2, or Lifeact–Ruby in 20 h APF DIOMs. Single channels were shown. (B and C) Live pupae were injected with LysoTracker Red (B) or DQ Red-BSA (C), and DIOMs were imaged through the cuticle at 20 h APF. Single channels were shown. (D) Scheme of an experiment using *shibire* temperature-sensitive mutant (*shi<sup>ts1</sup>*). *shi<sup>ts1</sup>* mutant was incubated at 19°C all the time (Permissive) or 29°C from P4 to P5 stage (Restrictive). (E and F) Spin–RFP-positive tubular network in DIOM at P5 stage (E). Quantification of the Spin–RFP-positive tubules in panel E (F). The average  $\pm$  SD is shown, n=5. NS, not significant; (Student's *t*-test).

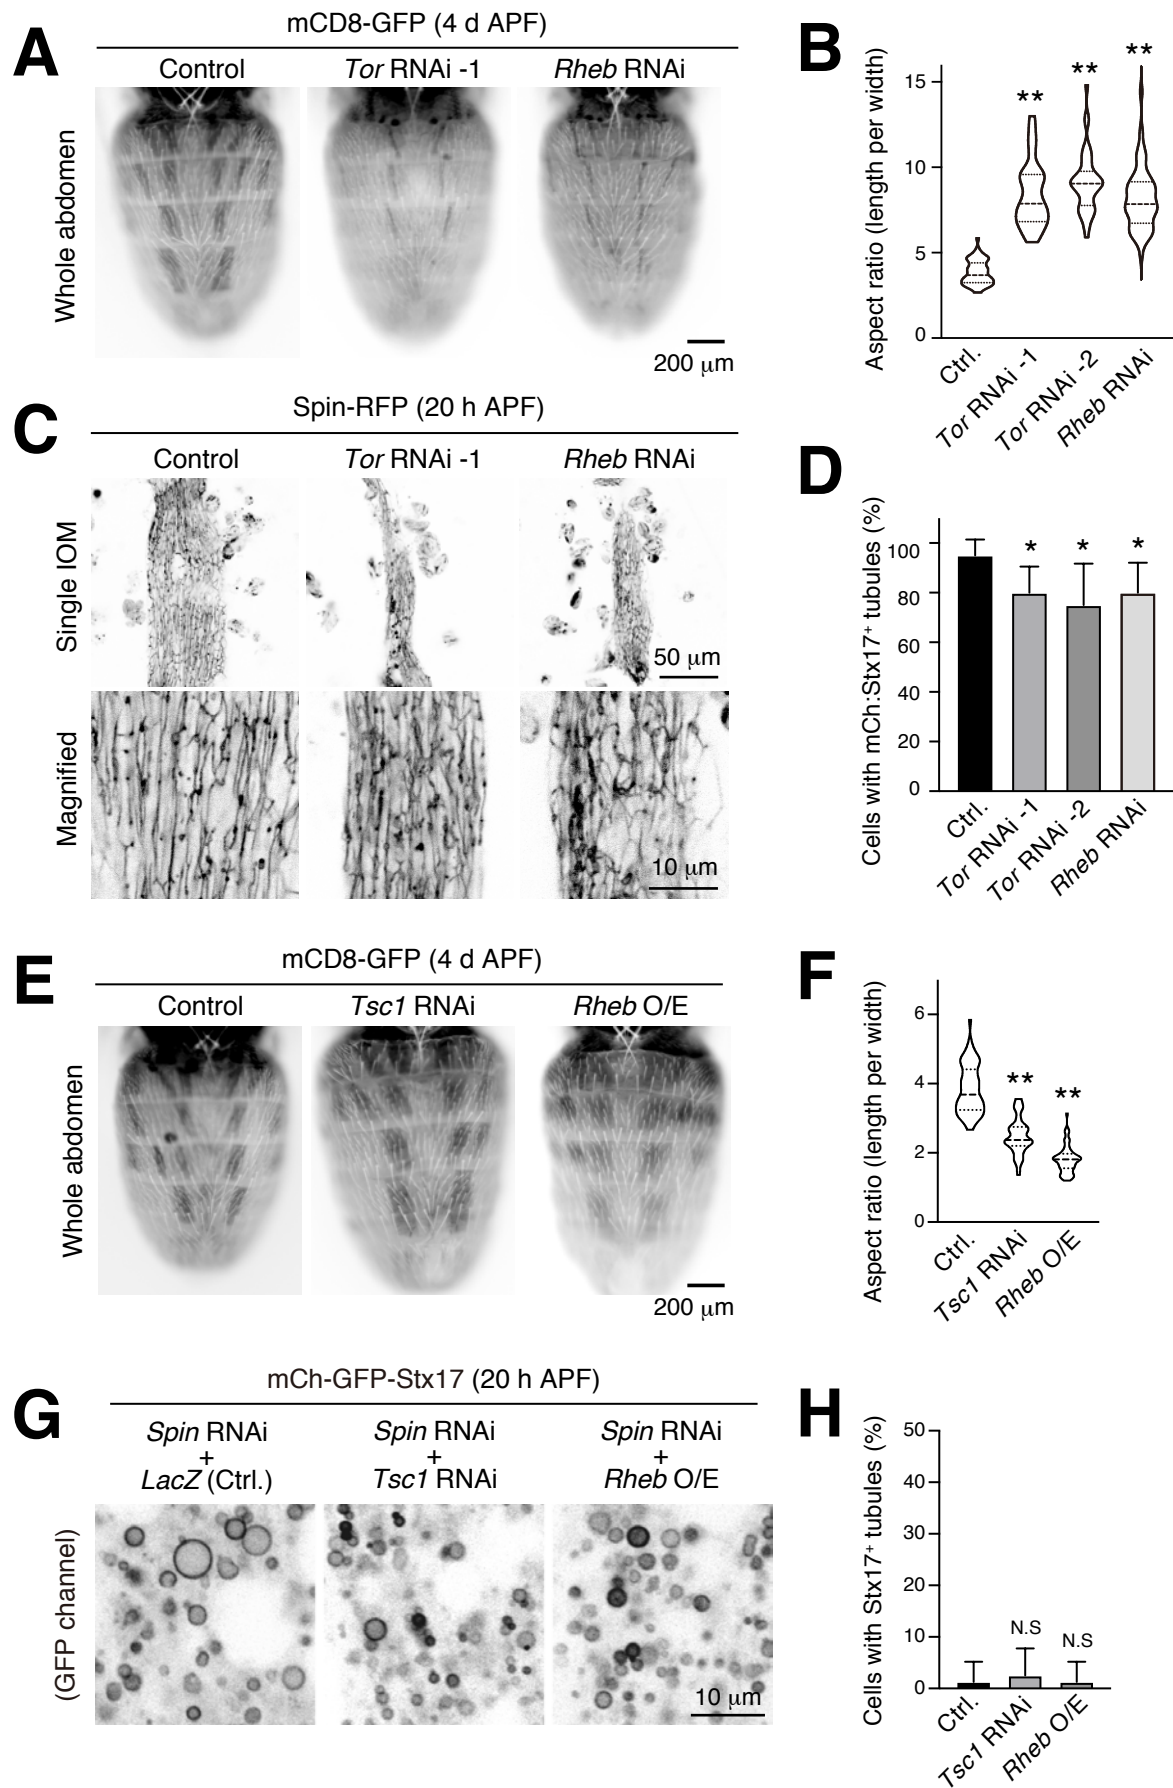

Figure S2

**Figure S2 Forced activation or inactivation of mTOR in DIOMs**

(A and B) Effect of forced mTOR inactivation on the shape of DIOMs at 4 d APF (A). Violin plot of the aspect ratio of DIOMs, n>40. \*\*, p<0.001 (Dunnett's test) (B). (C and D) Effect of forced mTOR inactivation on the formation of the Spin-RFP-positive tubular structures in 20 h APF DIOMs (C). Mean percent + SD of DIOMs with Spin-RFP-positive tubules, n=10. \*, p<0.05 (Dunnett's test) (D). (E and F) Effect of forced mTOR activation on the shape of DIOMs at 4 d APF (E). Violin plot of the aspect ratio of DIOMs, n>50. \*\*, p<0.001 (Dunnett's test) (F). (G and H) Genetic interaction between *Spin* and mTOR regulators. Combination of *Spin* RNAi and *Tsc1* RNAi or *Rheb* overexpression on mCherry-GFP-Stx17-positive structures in 20 h APF DIOMs (G). Mean percent + SD of DIOMs with Stx17-positive tubules, n=10. N.S, not significant (Dunnett's test) (H).



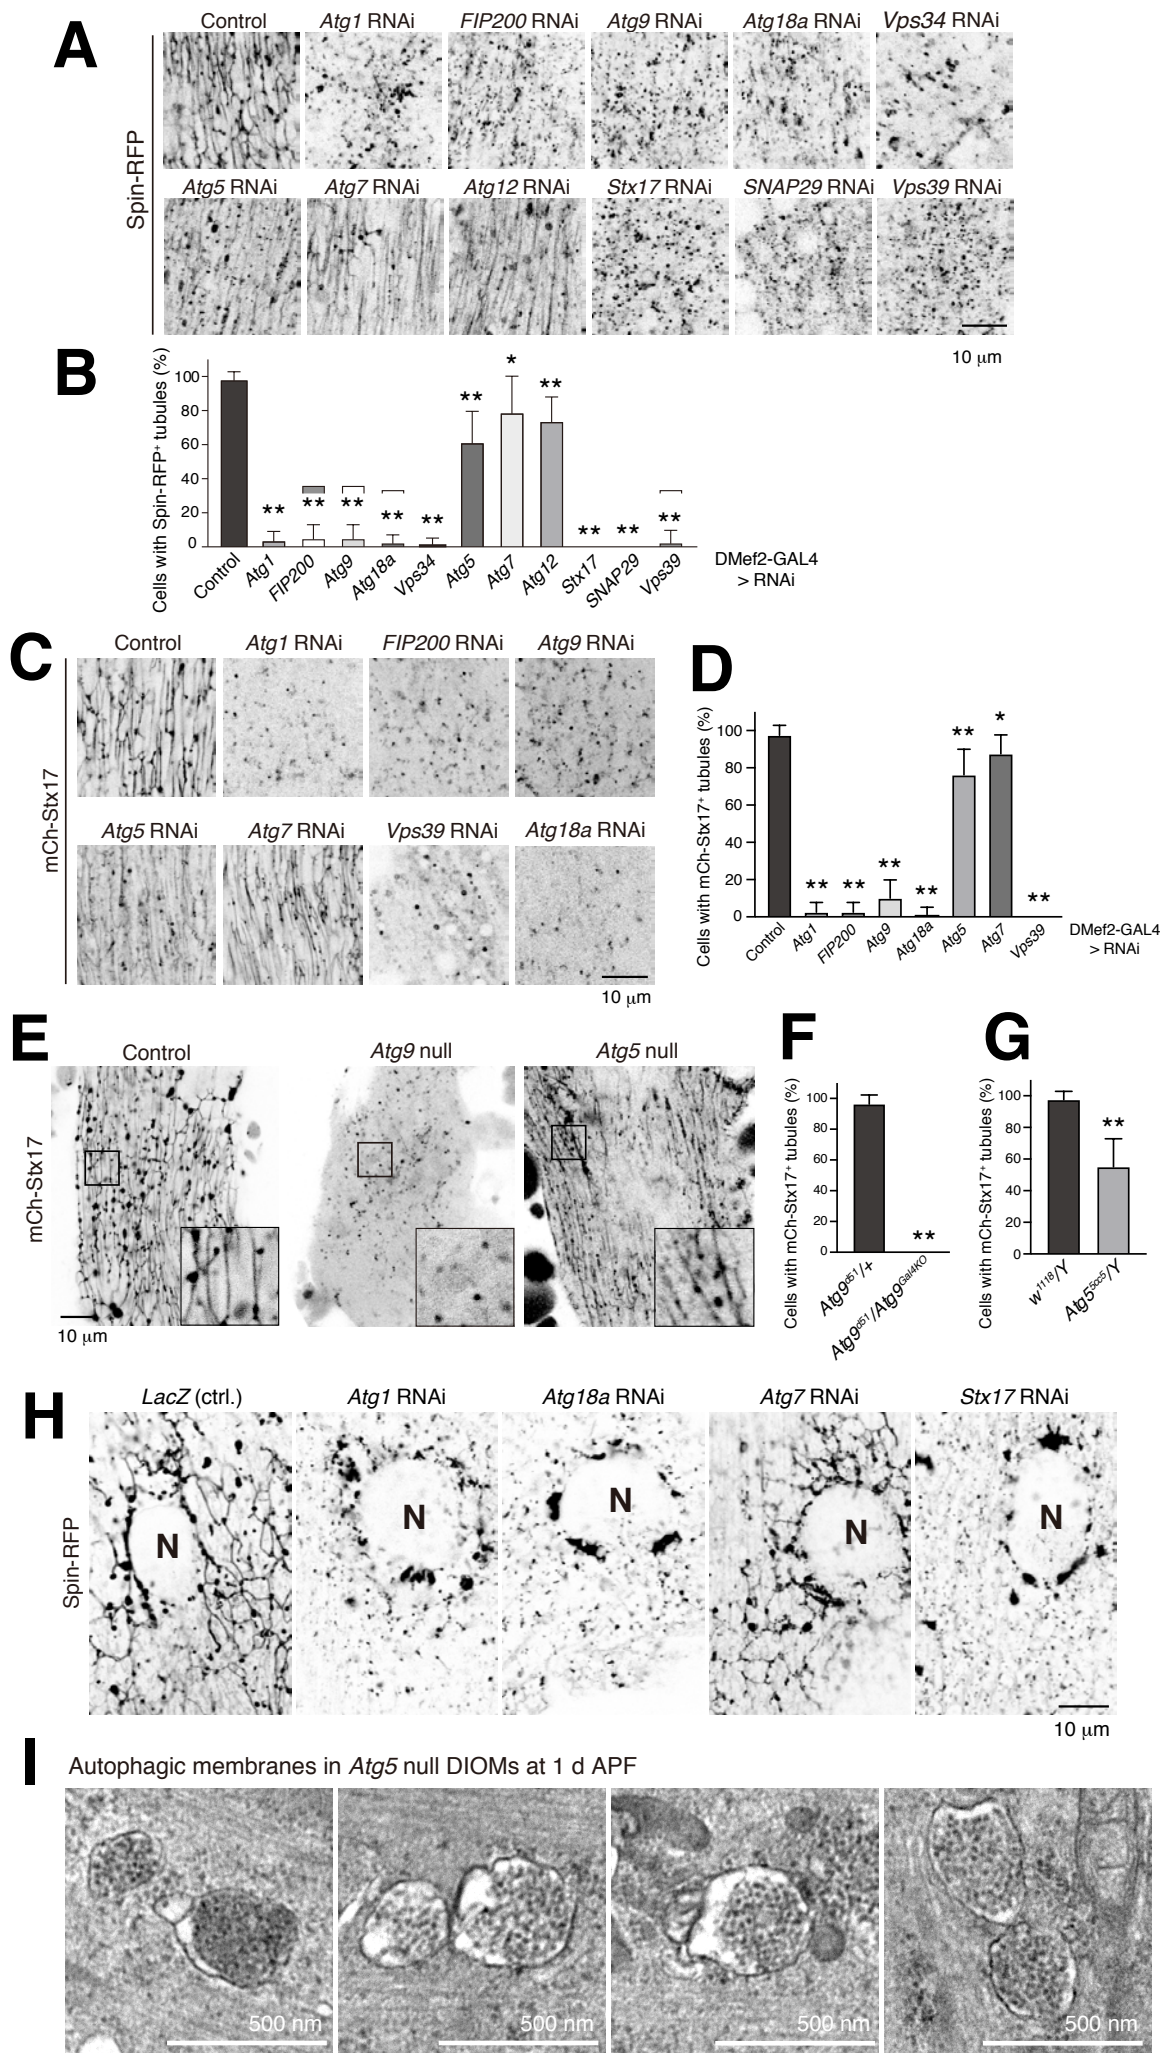

Figure S3

**Figure S3 Loss of *ATG* genes on the tubular autolysosome network**

(A and B) Effect of RNAi of autophagy-related (*ATG*) genes on Spin-RFP-positive tubular network in 20 h APF DIOMs (A). Mean percent + SD of DIOMs with more than 5  $\mu\text{m}$  Spin-RFP-positive tubules, n=10. \*, p<0.05; \*\*, p<0.001 (Dunnett's test)

(B).

(C and D) Effect of RNAi of autophagy-related genes on mCherry-Stx17-positive tubules in 20 h APF DIOMs (C). Mean percent + SD of DIOMs with more than 5  $\mu\text{m}$  mCherry-Stx17-positive tubules, n=10. \*, p<0.05; \*\*, p<0.001 (Dunnett's test) (D).

(E-G) mCherry-Stx17 in control, *Atg9* null, or *Atg5* null DIOMs at 20 h APF (E). Mean percent + SD of DIOMs with more than 5  $\mu\text{m}$  mCherry-Stx17-positive tubules in control or *Atg9* null, n=10 (F), control or *Atg5* null, n=10 (G). \*\*p<0.001 (Student's *t*-test).

(H) Effect of RNAi of autophagy-related genes on Spin-RFP-positive tubules in 3IL body wall muscle. The images are sections close to the sarcolemma. N, nucleus. (I) Typical double-membraned structures in the electron micrograms of *Atg5* null DIOMs at 20 h APF.



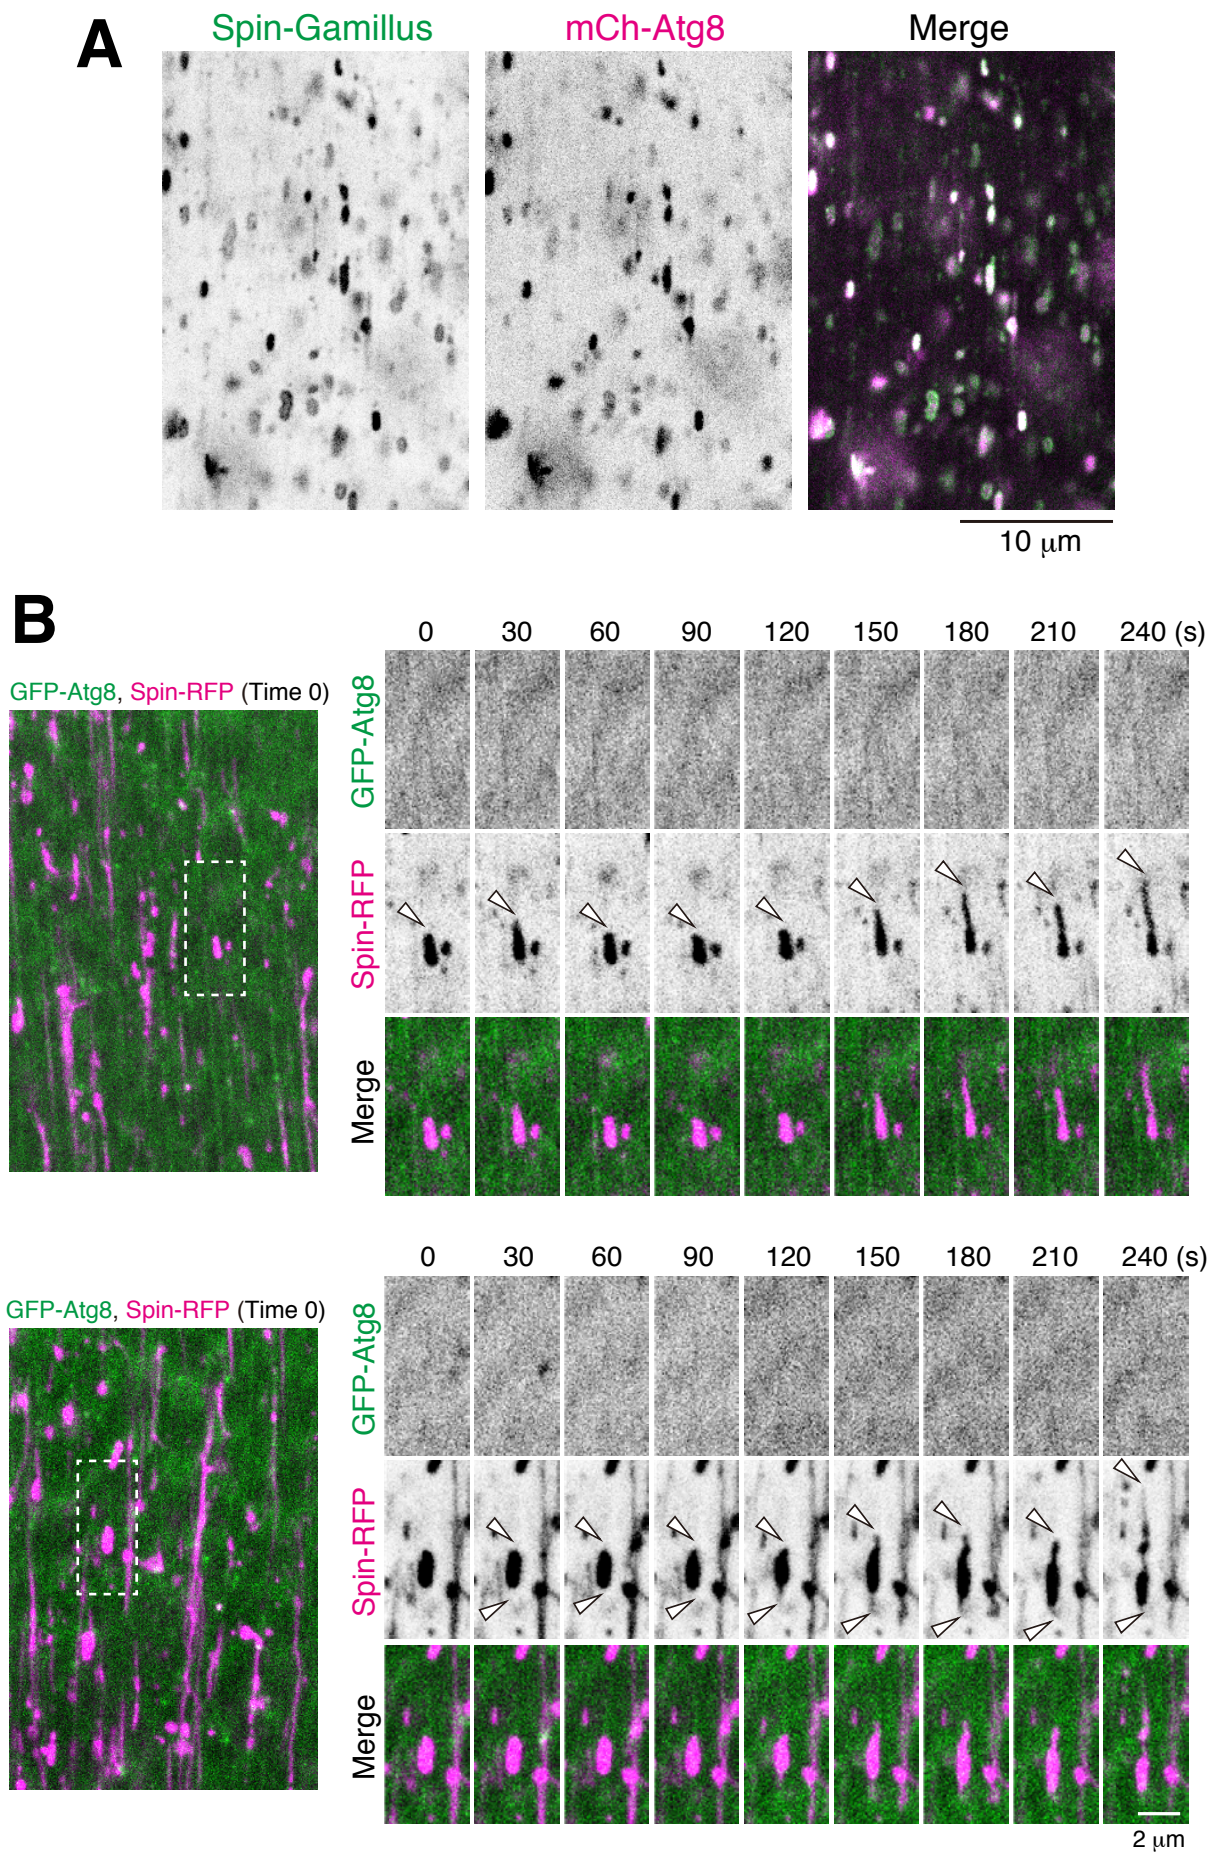

Figure S4

**Figure S4 Autophagosome fusion is a prerequisite for the initial tubulation process in the tAL network formation**

(A) Colocalization between Spin–Gamillus and mCh–Atg8a in 12 h APF DIOMs. (B) Time-lapse imaging of Spin–RFP and GFP–Atg8a in control DIOMs around 14 h APF. White arrowheads indicate the tips of elongating tubules.



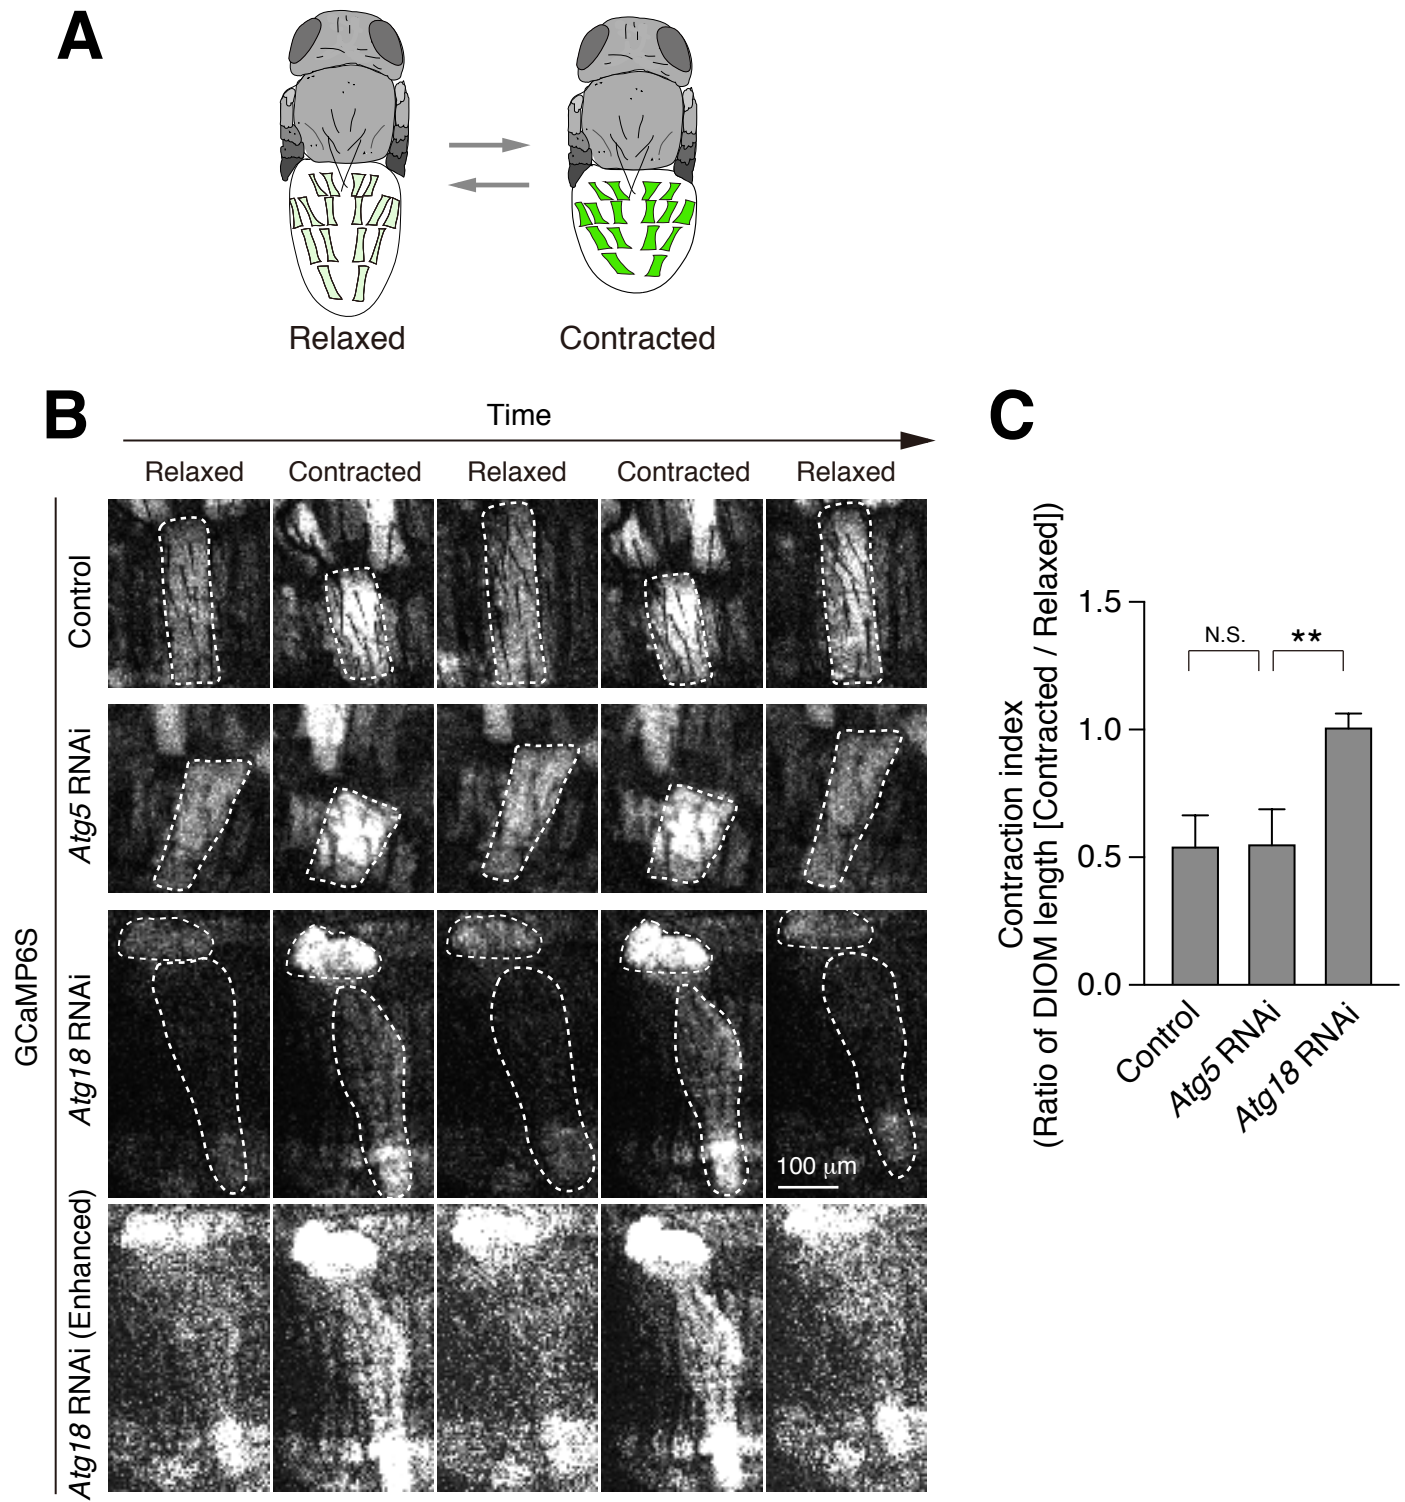

**Figure S5**

**Figure S5 Contractile function of *ATG*-RNAi DIOMs upon the elevation of Ca<sup>2+</sup> levels**

(A) Schematic model of DIOM contraction in 4 d APF fly. GCaMP6S signal becomes brighter upon the elevation of cytosolic Ca<sup>2+</sup> levels in DIOMs. (B) Time-lapse imaging of GCaMP6S in 4 d APF DIOMs of control, *Atg5* RNAi, or *Atg18a* RNAi. Two contraction cycles were shown for each. (C) Mean percent + SD of DIOM contraction index. The index is defined as the length of contracted DIOM divided by that of relaxed DIOMs. Four contractions of single DIOM were analyzed and averaged. N=5. N.S, not significant; \*\*, p<0.001 (Dunnett's test).

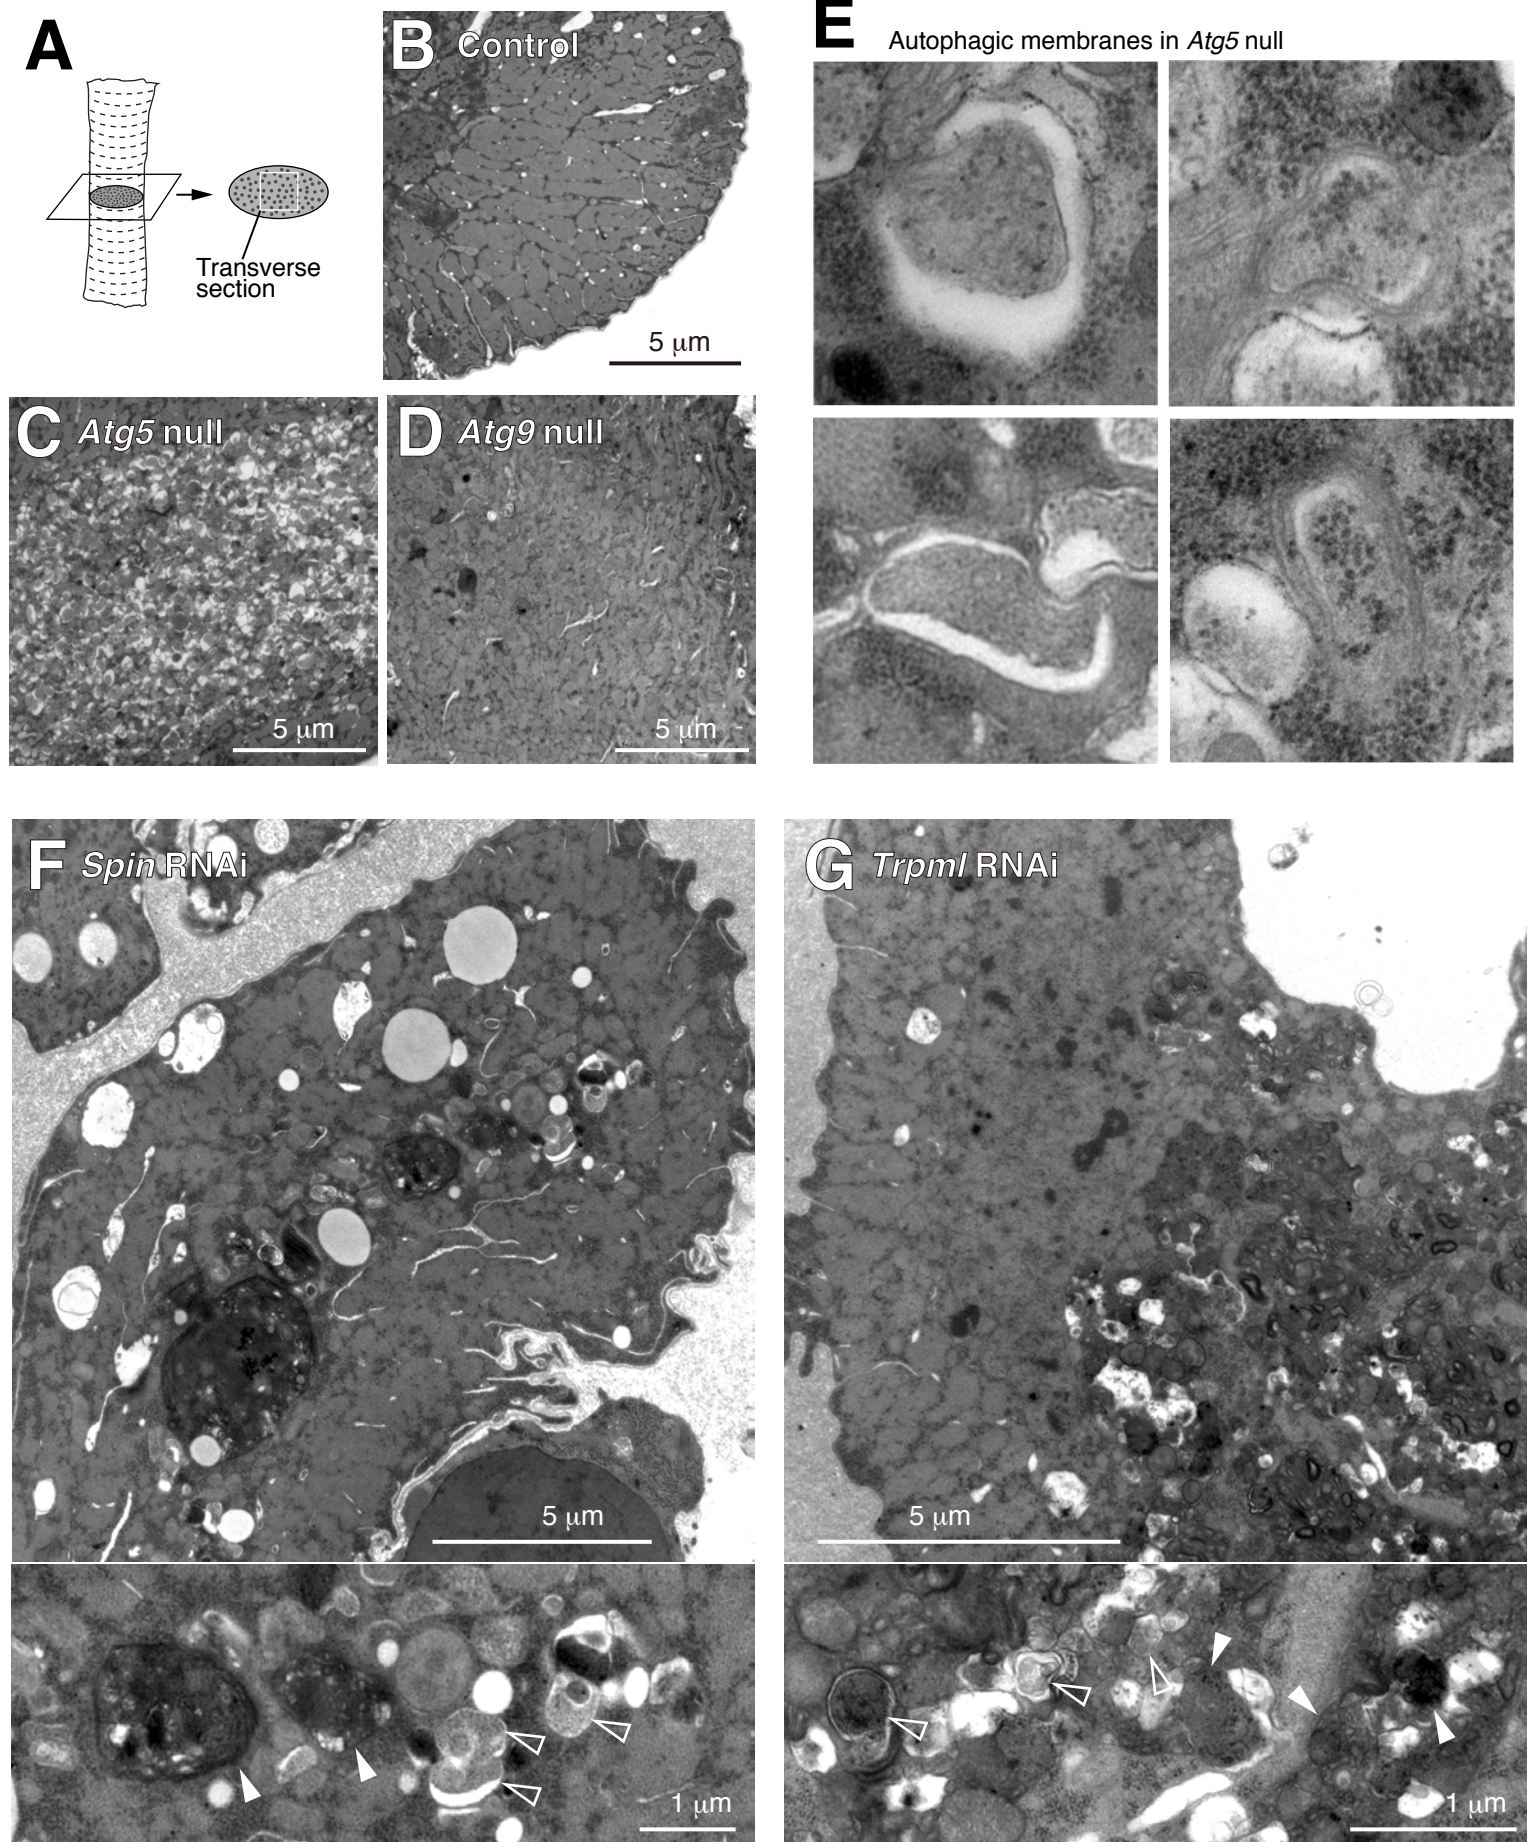

**Figure S6**



**Figure S6 Ultrastructure of 4 d APF DIOMs of *Atg5* null, *Atg9* null, *Spin* RNAi, or *Trpml* RNAi**

(A) Schematic of a DIOM TEM transverse section. (B-D) TEM images of 4 d APF DIOM transverse-section of control (B), *Atg5* null (C), or *Atg9* null (D). (E) Typical examples of autophagic structures in *Atg5* null DIOMs at 4 d APF. (F and G) TEM images of 4 d APF DIOM transverse-section of *Spin* RNAi (F) or *Trpml* RNAi (G). Autolysosome, white arrowhead; autophagosome, colorless arrowhead.



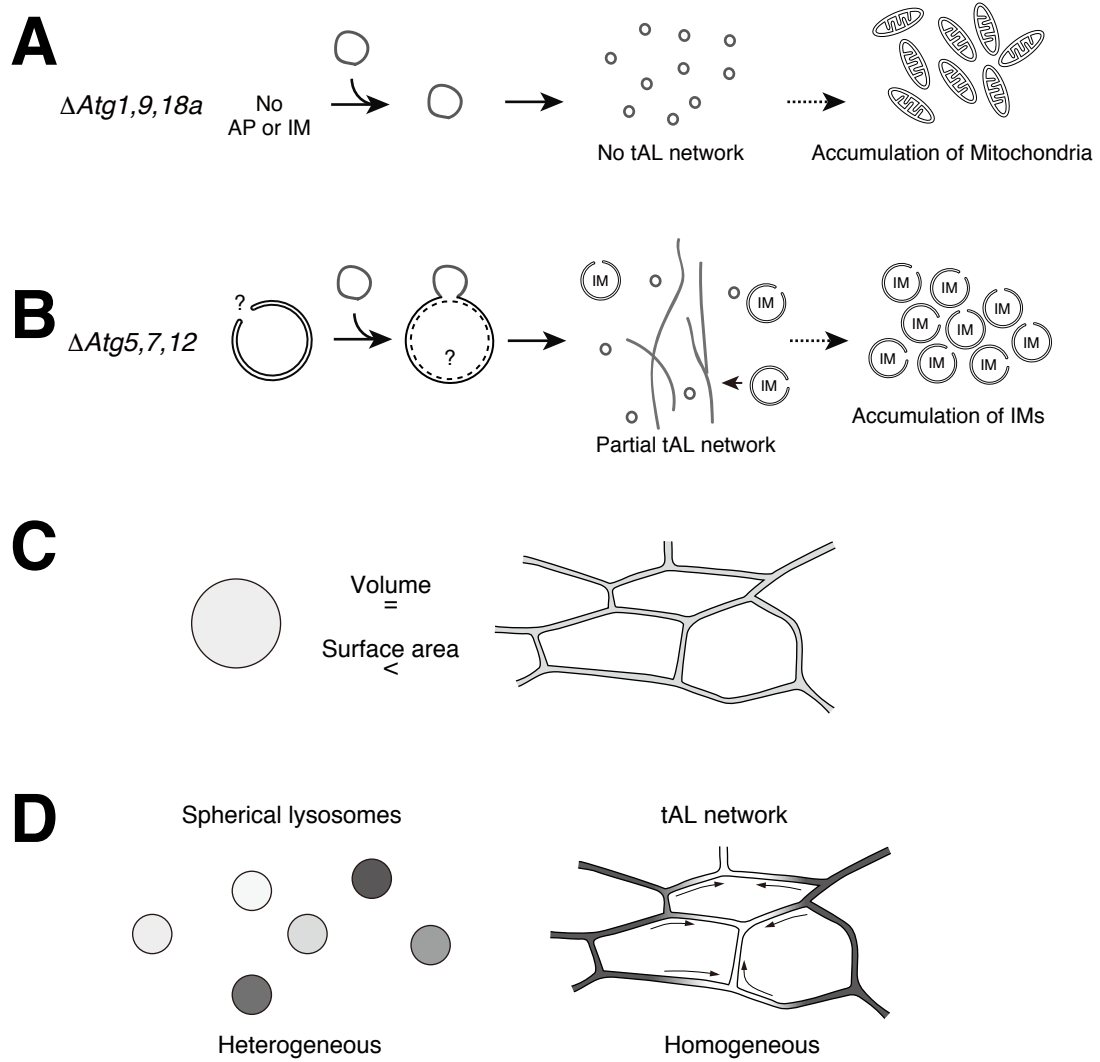

**Figure S7**

**Figure S7 Possible model of the tAL network formation and its significance**

(A) No autophagic membrane in loss of *Atg1*, *9*, or *18a*, which results in no tAL network.

(B) Fusion of late isolation membranes with lysosomes leads to partially defective tAL network in loss of *Atg5*, *7*, or *12*.

(C) A ratio of surface area per volume of a ranging between 50 to 70-nm-diameter tube and 500-nm-diameter spherical vesicle. The tube has ~5 times higher score than that of the vesicle.

(D) The tAL network is homogeneous over a wide range compared to a number of spherical, discontinuous lysosomes.

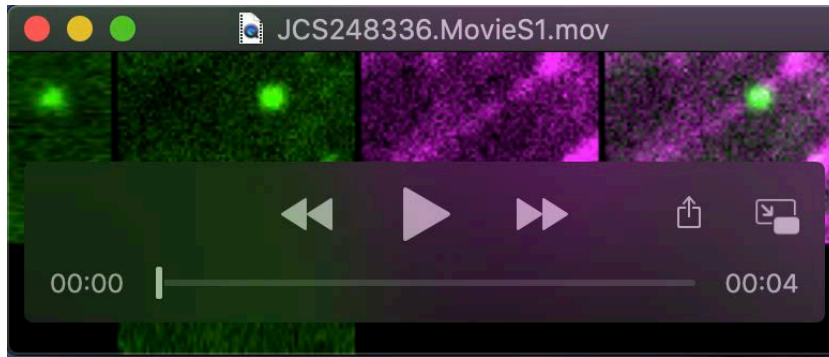

**Movie 1 Time-lapse imaging of Spin:RFP and GFP:Atg8a in 20 h APF DIOMs**

The DIOM expressing both Spin:RFP and GFP:Atg8a was imaged every 60 s for 30 min on an inverted microscope with a spinning-disc confocal scanner unit and a CMOS camera. Z-stacked images were shown.

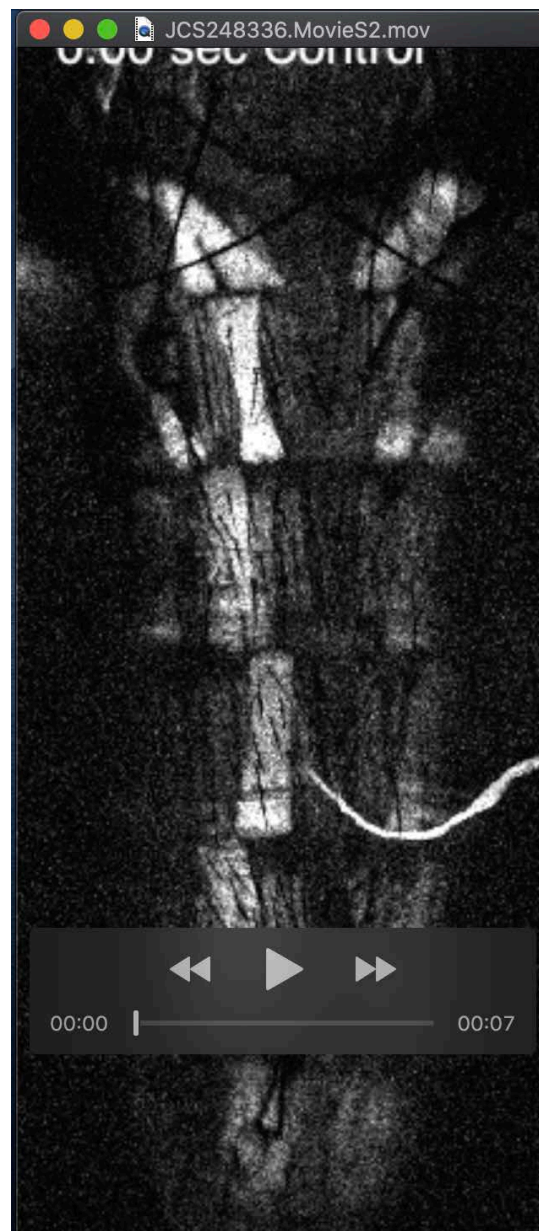

**Movie 2 Time-lapse imaging of contraction of control DIOMs**

Four days APF DIOMs expressing GCaMP6S and LacZ (control) was imaged every 570 ms for 85 s (150 frames) by confocal laser scanning microscope.

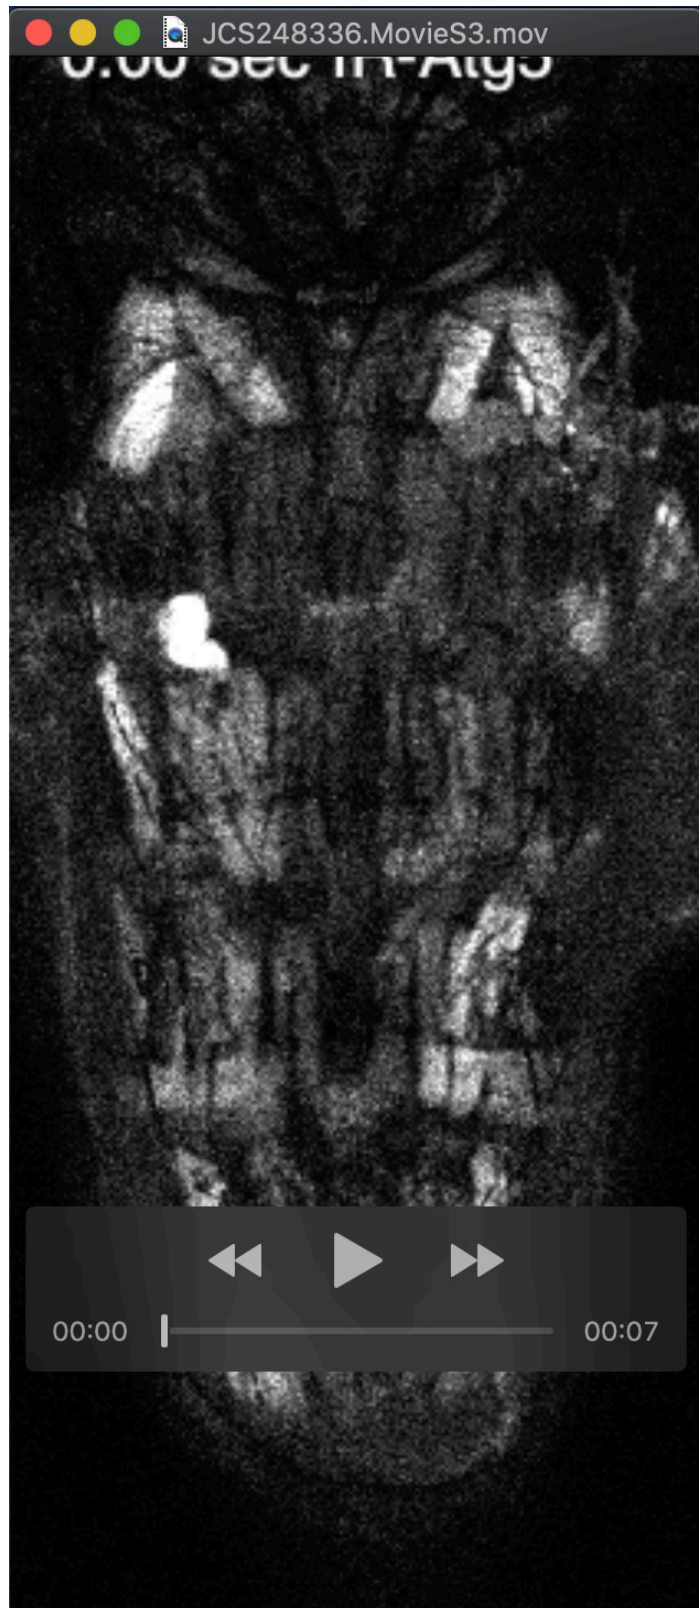

**Movie 3 Time-lapse imaging of contraction of *Atg5* RNAi DIOMs**

Four days APF DIOMs expressing GCaMP6S and IR-*Atg5* (*Atg5* RNAi) was imaged every 570 ms for 85 s (150 frames) by confocal laser scanning microscope.



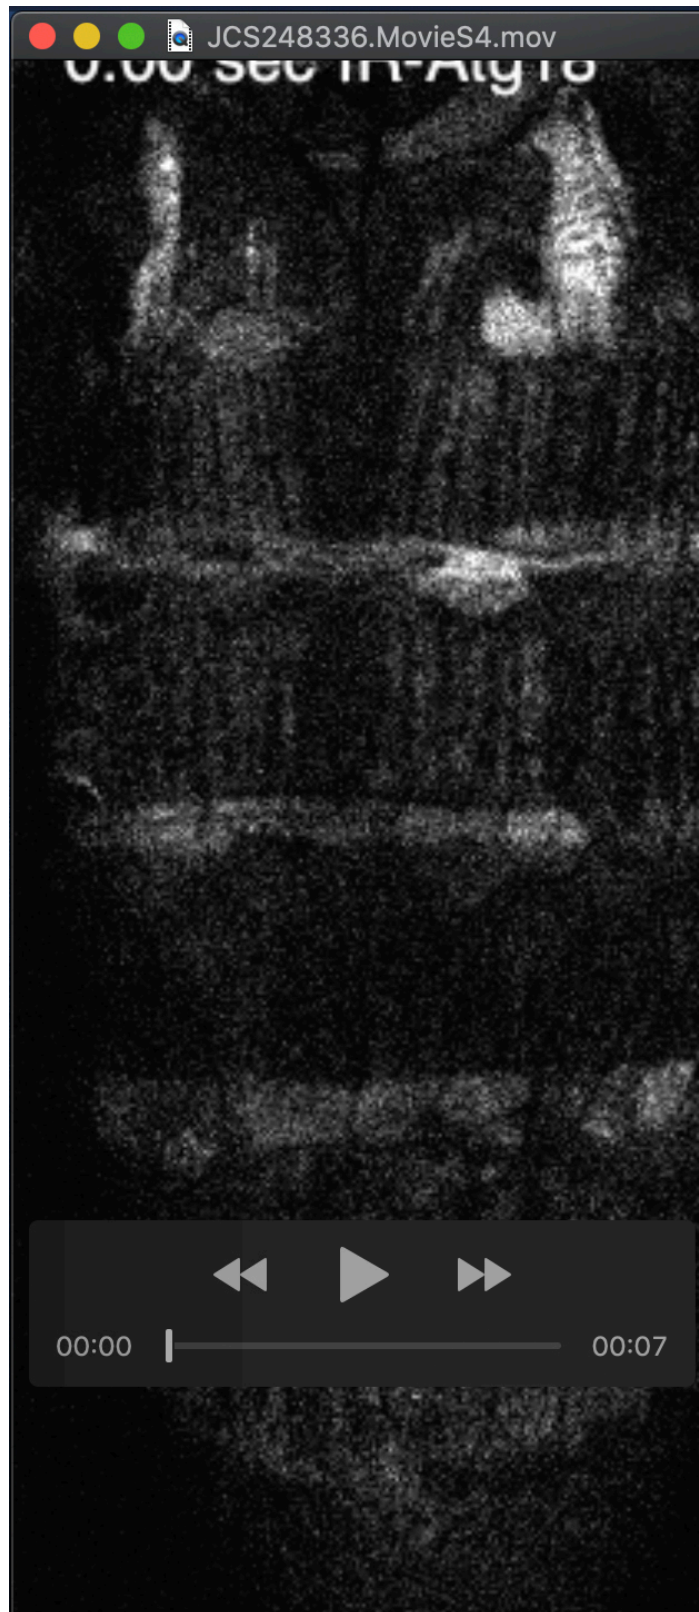

**Movie 4 Time-lapse imaging of contraction of *Atg18* RNAi DIOMs**

Four days APF DIOMs expressing GCaMP6S and IR-*Atg18* (*Atg18* RNAi) was imaged every 570 ms for 85 s (150 frames) by confocal laser scanning microscope.

**Table S1. Detailed *Drosophila* genotypes shown in figures**

|                                                                       | Panel #                                                                                                               | Genotype                                                                                       | Stage                                                    | Temp (°C) | Microscopy |
|-----------------------------------------------------------------------|-----------------------------------------------------------------------------------------------------------------------|------------------------------------------------------------------------------------------------|----------------------------------------------------------|-----------|------------|
| Figure 1                                                              | 1B                                                                                                                    | <i>UAS-mCD8:GFP/+; DMef2-GAL4/+</i>                                                            | 3IL to 4 d APF                                           | 25°C      | FV1000D    |
|                                                                       | 1C                                                                                                                    | <i>DMef2-GAL4/UAS-GFP:Stx17</i>                                                                | 3IL to 4 d APF                                           | 25°C      | FV1000D    |
|                                                                       | 1D                                                                                                                    | <i>DMef2-GAL4/UAS-GFP:Stx17</i>                                                                | 12 to 20 h APF                                           | 25°C      | FV1000D    |
| Figure 2                                                              | 2A                                                                                                                    | <i>UAS-mCh:GFP:Atg8a/+; DMef2-GAL4/+</i>                                                       | 3IL to 4 APF                                             | 25°C      | FV1000D    |
|                                                                       | 2B                                                                                                                    | <i>UAS-mCh:Atg8a/+; DMef2-GAL4, UAS-GFP:Stx17/+</i>                                            | 20 h APF                                                 | 25°C      | FV1000D    |
|                                                                       | 2C                                                                                                                    | <i>UAS-Spin:myc:RFP/+; DMef2-GAL4, UAS-GFP:Stx17/+</i>                                         | 20 h APF                                                 | 25°C      | FV1000D    |
|                                                                       |                                                                                                                       | <i>DMef2-GAL4, UAS-GFP:Stx17/UAS-Cp1.mKO2</i>                                                  | 20 h APF                                                 | 25°C      | FV1000D    |
|                                                                       |                                                                                                                       | <i>UAS-Lifeact:Ruby/+; DMef2-GAL4, UAS-GFP:Stx17/+</i>                                         | 20 h APF                                                 | 25°C      | FV1000D    |
|                                                                       |                                                                                                                       | <i>DMef2-GAL4/UAS-GFP:Stx17 (Injection of LysoTracker Red)</i>                                 | 20 h APF                                                 | 25°C      | FV3000     |
|                                                                       | 2E                                                                                                                    | <i>DMef2-GAL4/UAS-GFP:Stx17 (Injection of DQ-BSA)</i>                                          | 20 h APF                                                 | 25°C      | FV3000     |
|                                                                       | 2F                                                                                                                    | <i>UAS-GFP:Atg8a/UAS-Spin:myc:RFP; DMef2-GAL4/+</i>                                            | 20 h APF                                                 | 25°C      | Dragonfly  |
|                                                                       | 2H and I                                                                                                              | <i>UAS-LacZ/+; DMef2-GAL4, UAS-GFP:Stx17/+</i>                                                 | 20 h APF                                                 | 25°C      | FV1000D    |
|                                                                       |                                                                                                                       | <i>UAS-IR-Spin<sup>NIG8428R-4</sup>/+; DMef2-GAL4, UAS-GFP:Stx17/+</i>                         | 20 h APF                                                 | 25°C      | FV1000D    |
| <i>UAS-IR-Trpml<sup>HMS02618</sup>/+; DMef2-GAL4, UAS-GFP:Stx17/+</i> |                                                                                                                       | 20 h APF                                                                                       | 25°C                                                     | FV1000D   |            |
| <i>DMef2-GAL4, UAS-GFP:Stx17/UAS-IR-Vha68-3<sup>NIG5075R-1</sup></i>  |                                                                                                                       | 20 h APF                                                                                       | 25°C                                                     | FV1000D   |            |
| Figure 3                                                              | 3A                                                                                                                    | <i>w/Y; UAS-Spin:RFP/+; DMef2-GAL4, UAS-Dcr2/+</i>                                             | 20 h APF                                                 | 25°C      | FV1000D    |
|                                                                       | 3B                                                                                                                    | <i>Atg5<sup>5cc5</sup>/Y; UAS-Spin:myc:RFP/+; DMef2-GAL4, UAS-Dcr2/+</i>                       | 20 h APF                                                 | 25°C      | FV1000D    |
|                                                                       | 3C                                                                                                                    | <i>w/Y; Atg9<sup>951</sup>, UAS-Spin:myc:RFP/Atg9<sup>Gal4KO</sup>; DMef2-GAL4, UAS-Dcr2/+</i> | 20 h APF                                                 | 25°C      | FV1000D    |
|                                                                       | 3D                                                                                                                    | <i>w/Y; Atg9<sup>951</sup>, UAS-Spin:myc:RFP/+; DMef2-GAL4, UAS-Dcr2/+</i>                     | 20 h APF                                                 | 25°C      | -          |
|                                                                       |                                                                                                                       | <i>w/Y; Atg9<sup>951</sup>, UAS-Spin:myc:RFP/Atg9<sup>Gal4KO</sup>; DMef2-GAL4, UAS-Dcr2/+</i> | 20 h APF                                                 | 25°C      | -          |
|                                                                       | 3E                                                                                                                    | <i>UAS-Spin:myc:RFP/+; DMef2-GAL4, Stx17<sup>LL</sup>/Stx17<sup>DF1_Exel18098</sup></i>        | 20 h APF                                                 | 25°C      | FV1000D    |
|                                                                       | 3F                                                                                                                    | <i>UAS-Spin:myc:RFP/+; DMef2-GAL4, Stx17<sup>LL</sup>/+</i>                                    | 20 h APF                                                 | 25°C      | -          |
|                                                                       |                                                                                                                       | <i>UAS-Spin:myc:RFP/+; DMef2-GAL4, Stx17<sup>LL</sup>/Stx17<sup>DF1_Exel18098</sup></i>        | 20 h APF                                                 | 25°C      | -          |
|                                                                       | 3G                                                                                                                    | <i>Atg5<sup>5cc5</sup>/Y; UAS-Spin:myc:RFP/+; DMef2-GAL4, UAS-IR-Stx17<sup>JF01937</sup>/+</i> | 20 h APF                                                 | 25°C      | FV1000D    |
|                                                                       | 3H                                                                                                                    | <i>w/Y; UAS-Spin:myc:RFP/+; DMef2-GAL4, UAS-Dcr2/+</i>                                         | 20 h APF                                                 | 25°C      | -          |
|                                                                       |                                                                                                                       | <i>Atg5<sup>5cc5</sup>/Y; UAS-Spin:myc:RFP/+; DMef2-GAL4, UAS-Dcr2/+</i>                       | 20 h APF                                                 | 25°C      | -          |
|                                                                       |                                                                                                                       | <i>Atg5<sup>5cc5</sup>/Y; UAS-Spin:myc:RFP/+; DMef2-GAL4, UAS-IR-Stx17<sup>JF01937</sup>/+</i> | 20 h APF                                                 | 25°C      | -          |
| 3I and J                                                              | <i>UAS-IR-Spin, UAS-mCh:GFP:Stx17/UAS-LacZ; DMef2-GAL4, UAS-Dcr2, tub-GAL80<sup>ts</sup></i>                          | 20 h APF                                                                                       | 25°C                                                     | FV1000D   |            |
|                                                                       | <i>UAS-IR-Spin, UAS-mCh:GFP:Stx17/UAS-IR-Atg18a<sup>V105366</sup>; DMef2-GAL4, UAS-Dcr2, tub-GAL80<sup>ts</sup>/+</i> | 20 h APF                                                                                       | 25°C                                                     | FV1000D   |            |
|                                                                       | <i>UAS-IR-Spin, UAS-mCh:GFP:Stx17/UAS-IR-Vps39<sup>HMS02438</sup>; DMef2-GAL4, UAS-Dcr2, tub-GAL80<sup>ts</sup>/+</i> | 20 h APF                                                                                       | 25°C                                                     | FV1000D   |            |
| Figure 4                                                              | 4A                                                                                                                    | <i>w; +/+; +/+</i>                                                                             | 20 h APF                                                 | 25°C      | H-7100     |
|                                                                       | 4B                                                                                                                    | <i>w; Atg9<sup>951</sup>/Atg9<sup>Gal4KO</sup>; +/+</i>                                        | 20 h APF                                                 | 25°C      | H-7100     |
|                                                                       | 4C                                                                                                                    | <i>w; +/+; FIP200<sup>3FG</sup>/FIP200<sup>4G7</sup></i>                                       | 20 h APF                                                 | 25°C      | H-7100     |
|                                                                       | 4D                                                                                                                    | <i>Atg5<sup>5cc5</sup>/Y; +/+; +/+</i>                                                         | 20 h APF                                                 | 25°C      | H-7100     |
|                                                                       | 4E and F                                                                                                              | <i>w; +/+; +/+</i>                                                                             | 20 h APF                                                 | 25°C      | H-7100     |
|                                                                       |                                                                                                                       | <i>UAS-IR-Spin<sup>NIG8428R-4</sup>/+; DMef2-GAL4, UAS-Dcr2/+</i>                              | 20 h APF                                                 | 25°C      | H-7100     |
|                                                                       | 4H                                                                                                                    | <i>UAS-IR-Trpml<sup>HMS02618</sup>/+; DMef2-GAL4, UAS-Dcr2/+</i>                               | 20 h APF                                                 | 25°C      | H-7100     |
|                                                                       | Figure 5                                                                                                              | A-C                                                                                            | <i>UAS-Spin:myc:RFP/UAS-LacZ; DMef2-GAL4, UAS-Dcr2/+</i> | 14 h APF  | 25°C       |
| D                                                                     |                                                                                                                       | <i>UAS-Spin:myc:RFP/+; DMef2-GAL4, UAS-Dcr2/UAS-IR-Stx17<sup>JF01937</sup></i>                 | 14 h APF                                                 | 25°C      | FV3000     |
| Figure 6                                                              | 6A and B                                                                                                              | <i>UAS-mCD8:GFP/UAS-LacZ; DMef2-GAL4, UAS-Dcr2/+</i>                                           | 4 d APF                                                  | 25°C      | SZX16      |
|                                                                       |                                                                                                                       | <i>UAS-mCD8:GFP/+; DMef2-GAL4, UAS-Dcr2/UAS-IR-Atg5<sup>NIG1643R-2</sup></i>                   | 4 d APF                                                  | 25°C      | SZX16      |
|                                                                       |                                                                                                                       | <i>UAS-mCD8:GFP/+; DMef2-GAL4, UAS-Dcr2/UAS-IR-Atg12<sup>HMS01153</sup></i>                    | 4 d APF                                                  | 25°C      | SZX16      |
|                                                                       |                                                                                                                       | <i>UAS-mCD8:GFP/+; DMef2-GAL4, UAS-Dcr2/UAS-IR-FIP200<sup>HMS01611</sup></i>                   | 4 d APF                                                  | 25°C      | SZX16      |
|                                                                       |                                                                                                                       | <i>UAS-mCD8:GFP/+; DMef2-GAL4, UAS-Dcr2/UAS-IR-Atg9<sup>HMS01246</sup></i>                     | 4 d APF                                                  | 25°C      | SZX16      |
|                                                                       |                                                                                                                       | <i>UAS-mCD8:GFP/UAS-IR-Atg18a<sup>V105366</sup>; DMef2-GAL4, UAS-Dcr2/+</i>                    | 4 d APF                                                  | 25°C      | SZX16      |
|                                                                       | 6C and D                                                                                                              | <i>w/Y; +/+; +/+</i>                                                                           | 4 d APF                                                  | 25°C      | FV1000D    |
|                                                                       |                                                                                                                       | <i>Atg5<sup>5cc5</sup>/Y; +/+; +/+</i>                                                         | 4 d APF                                                  | 25°C      | FV1000D    |
|                                                                       |                                                                                                                       | <i>w/Y; Atg9<sup>951</sup>/Atg9<sup>Gal4KO</sup>; +/+</i>                                      | 4 d APF                                                  | 25°C      | FV1000D    |
|                                                                       |                                                                                                                       | <i>UAS-Dcr2/UAS-LacZ; DMef2-GAL4, Sph-YFP:Mito/+</i>                                           | 4 d APF                                                  | 25°C      | FV1000D    |
|                                                                       |                                                                                                                       | <i>UAS-Dcr2/+; DMef2-GAL4, Sph-YFP:Mito/UAS-IR-Atg5<sup>NIG1643R-2</sup></i>                   | 4 d APF                                                  | 25°C      | FV1000D    |
|                                                                       |                                                                                                                       | <i>UAS-Dcr2/+; DMef2-GAL4, Sph-YFP:Mito/UAS-IR-Atg9<sup>HMS01246</sup></i>                     | 4 d APF                                                  | 25°C      | FV1000D    |
| 6F                                                                    | <i>UAS-Dcr2/UAS-LacZ; DMef2-GAL4, UAS-GFP:Stx17/+</i>                                                                 | 4 d APF                                                                                        | 25°C                                                     | FV1000D   |            |
|                                                                       | <i>UAS-Dcr2/+; DMef2-GAL4, UAS-GFP:Stx17/UAS-IR-Atg5<sup>NIG1643R-2</sup></i>                                         | 4 d APF                                                                                        | 25°C                                                     | FV1000D   |            |
|                                                                       | <i>UAS-Dcr2/+; DMef2-GAL4, UAS-GFP:Stx17/UAS-IR-Atg9<sup>HMS01246</sup></i>                                           | 4 d APF                                                                                        | 25°C                                                     | FV1000D   |            |
|                                                                       | <i>w/Y; +/+; +/+</i>                                                                                                  | 4 d APF                                                                                        | 25°C                                                     | H-7100    |            |
|                                                                       | <i>Atg5<sup>5cc5</sup>/Y; +/+; +/+</i>                                                                                | 4 d APF                                                                                        | 25°C                                                     | H-7100    |            |
|                                                                       | <i>w/Y; Atg9<sup>951</sup>/Atg9<sup>Gal4KO</sup>; +/+</i>                                                             | 4 d APF                                                                                        | 25°C                                                     | H-7100    |            |
| Figure 7                                                              | 7A                                                                                                                    | <i>DMef2-GAL4, UAS-Cp1.mKO2/UAS-GFP:Stx17</i>                                                  | 24 h APF                                                 | 25°C      | FV3000     |
|                                                                       | 7C                                                                                                                    | <i>UAS-Dcr2/UAS-LacZ; DMef2-GAL4, UAS-Cp1.mKO2, UAS-GFP:Stx17/+</i>                            | 24 h APF                                                 | 25°C      | FV3000     |
|                                                                       | 7D                                                                                                                    | <i>UAS-Spin<sup>NIG8428R-4</sup>/UAS-Dcr2; DMef2-GAL4, UAS-Cp1.mKO2, UAS-GFP:Stx17/+</i>       | 24 h APF                                                 | 25°C      | FV3000     |
| Figure 8                                                              | 8A and B                                                                                                              | <i>DMef2-GAL4/UAS-GFP:Stx17 (Injection of LysoTracker Red)</i>                                 | 24 h APF                                                 | 25°C      | FV3000     |
|                                                                       | 8C and D                                                                                                              | <i>DMef2-GAL4/UAS-GFP:Stx17 (Injection of DQ-BSA)</i>                                          | 24 h APF                                                 | 25°C      | FV3000     |
|                                                                       | 8E-H                                                                                                                  | <i>w; UAS-GFP/UAS-LacZ; DMef2-GAL4, UAS-Dcr2/+</i>                                             | 24 h APF                                                 | 25°C      | FV3000     |
|                                                                       |                                                                                                                       | <i>w; UAS-GFP/UAS-IR-Atg18a<sup>V105366</sup>; DMef2-GAL4, UAS-Dcr2/+</i>                      | 24 h APF                                                 | 25°C      | FV3000     |

|                                                                                                                     |                                                                                |                                                                                                                                                                   |           |         |         |
|---------------------------------------------------------------------------------------------------------------------|--------------------------------------------------------------------------------|-------------------------------------------------------------------------------------------------------------------------------------------------------------------|-----------|---------|---------|
| Figure S1                                                                                                           | S1A                                                                            | <i>UAS-Spin:myc:RFP/+; DMef2-GAL4, UAS-GFP:Stx17/+</i><br><i>DMef2-GAL4, UAS-GFP:Stx17/UAS-Cp1.mKO2</i><br><i>UAS-Lifeact:Ruby/+; DMef2-GAL4, UAS-GFP:Stx17/+</i> | 20 h APF  | 25°C    | FV1000D |
|                                                                                                                     |                                                                                |                                                                                                                                                                   | 20 h APF  | 25°C    | FV1000D |
|                                                                                                                     | S1B                                                                            | <i>DMef2-GAL4/UAS-GFP:Stx17</i> (Injection of LysoTracker Red)                                                                                                    | 20 h APF  | 25°C    | FV3000  |
|                                                                                                                     | S1C                                                                            | <i>DMef2-GAL4/UAS-GFP:Stx17</i> (Injection of DQ-BSA)                                                                                                             | 20 h APF  | 25°C    | FV3000  |
| S1E and F                                                                                                           | <i>shi[1]y; +/UAS-Spin-RFP; +/DMef2-GAL4, UAS-Dcr2</i>                         | P5                                                                                                                                                                | 19°C      | FV3000  |         |
|                                                                                                                     | <i>shi[1]y; +/UAS-Spin-RFP; +/DMef2-GAL4, UAS-Dcr2</i>                         | P5                                                                                                                                                                | 19 > 29°C | FV3000  |         |
| Figure S2                                                                                                           | S2A and B                                                                      | <i>UAS-mCD8:GFP/UAS-LacZ; DMef2-GAL4, UAS-Dcr2/+</i>                                                                                                              | 4 d APF   | 25°C    | SZX16   |
|                                                                                                                     |                                                                                | <i>UAS-mCD8:GFP/+; DMef2-GAL4, UAS-Dcr2/UAS-IR-TOR<sup>GL00156</sup> (Tor RNAi -1)</i>                                                                            | 4 d APF   | 25°C    | SZX16   |
|                                                                                                                     |                                                                                | <i>UAS-mCD8:GFP/+; DMef2-GAL4, UAS-Dcr2/UAS-IR-TOR<sup>HMS01114</sup> (Tor RNAi -2)</i>                                                                           | 4 d APF   | 25°C    | SZX16   |
|                                                                                                                     |                                                                                | <i>UAS-mCD8:GFP/+; DMef2-GAL4, UAS-Dcr2/UAS-IR-Rheb<sup>HMS00923</sup></i>                                                                                        | 4 d APF   | 25°C    | SZX16   |
|                                                                                                                     | S2C and D                                                                      | <i>UAS-Spin:myc:RFP/UAS-LacZ; DMef2-GAL4, UAS-Dcr2/+</i>                                                                                                          | 20 h APF  | 25°C    | FV1000D |
|                                                                                                                     |                                                                                | <i>UAS-Spin:myc:RFP/+; DMef2-GAL4, UAS-Dcr2/UAS-IR-TOR<sup>GL00156</sup> (Tor RNAi -1)</i>                                                                        | 20 h APF  | 25°C    | FV1000D |
|                                                                                                                     | S2E and F                                                                      | <i>UAS-Spin:myc:RFP/+; DMef2-GAL4, UAS-Dcr2/UAS-IR-TOR<sup>HMS01114</sup> (Tor RNAi -2)</i>                                                                       | 4 d APF   | 25°C    | FV3000  |
|                                                                                                                     |                                                                                | <i>UAS-Spin:myc:RFP/+; DMef2-GAL4, UAS-Dcr2/UAS-IR-Rheb<sup>HMS00923</sup></i>                                                                                    | 20 h APF  | 25°C    | FV1000D |
|                                                                                                                     |                                                                                | <i>UAS-mCD8:GFP/UAS-LacZ; DMef2-GAL4, UAS-Dcr2/+</i>                                                                                                              | 4 d APF   | 25°C    | SZX16   |
|                                                                                                                     |                                                                                | <i>UAS-mCD8:GFP/+; DMef2-GAL4, UAS-Dcr2/UAS-IR-Tsc1<sup>GL00012</sup></i>                                                                                         | 4 d APF   | 25°C    | SZX16   |
|                                                                                                                     | S2G and H                                                                      | <i>UAS-mCD8:GFP/+; DMef2-GAL4, UAS-Dcr2/UAS-Rheb.Pa</i>                                                                                                           | 4 d APF   | 25°C    | SZX16   |
|                                                                                                                     |                                                                                | <i>UAS-IR-Spin, UAS-mCh:GFP:Stx17/UAS-LacZ; DMef2-GAL4, UAS-Dcr2, tub-GAL80<sup>ts</sup></i>                                                                      | 20 h APF  | 25°C    | FV1000D |
| <i>UAS-IR-Spin, UAS-mCh:GFP:Stx17/+; DMef2-GAL4, UAS-Dcr2, tub-GAL80<sup>ts</sup>/UAS-IR-TSC1<sup>GL00012</sup></i> |                                                                                | 20 h APF                                                                                                                                                          | 25°C      | FV1000D |         |
| <i>UAS-IR-Spin, UAS-mCh:GFP:Stx17/+; DMef2-GAL4, UAS-Dcr2, tub-GAL80<sup>ts</sup>/UAS-Rheb.Pa</i>                   |                                                                                | 20 h APF                                                                                                                                                          | 25°C      | FV1000D |         |
| Figure S3                                                                                                           | S3A and B                                                                      | <i>UAS-Spin:myc:RFP/UAS-LacZ; DMef2-GAL4, UAS-Dcr2/+</i>                                                                                                          | 20 h APF  | 25°C    | FV1000D |
|                                                                                                                     |                                                                                | <i>UAS-Spin:myc:RFP/UAS-IR-Atg1; DMef2-GAL4, UAS-Dcr2/+</i>                                                                                                       | 20 h APF  | 25°C    | FV1000D |
|                                                                                                                     | S3C and D                                                                      | <i>UAS-Spin:myc:RFP/+; DMef2-GAL4, UAS-Dcr2/UAS-IR-FIP200<sup>HMS01611</sup></i>                                                                                  | 20 h APF  | 25°C    | FV1000D |
|                                                                                                                     |                                                                                | <i>UAS-Spin:myc:RFP/+; DMef2-GAL4, UAS-Dcr2/UAS-IR-Atg9<sup>HMS01246</sup></i>                                                                                    | 20 h APF  | 25°C    | FV1000D |
|                                                                                                                     |                                                                                | <i>UAS-Spin:myc:RFP/UAS-IR-Atg18a<sup>V105366</sup>; DMef2-GAL4, UAS-Dcr2/+</i>                                                                                   | 20 h APF  | 25°C    | FV1000D |
|                                                                                                                     |                                                                                | <i>UAS-Spin:myc:RFP/+; DMef2-GAL4, UAS-Dcr2/UAS-IR-Vps34<sup>NIG5379F-2</sup></i>                                                                                 | 20 h APF  | 25°C    | FV1000D |
|                                                                                                                     |                                                                                | <i>UAS-Spin:myc:RFP/+; DMef2-GAL4, UAS-Dcr2/UAS-IR-Atg5<sup>NIG1643R-2</sup></i>                                                                                  | 20 h APF  | 25°C    | FV1000D |
|                                                                                                                     |                                                                                | <i>UAS-Spin:myc:RFP/+; DMef2-GAL4, UAS-Dcr2/UAS-IR-Atg7<sup>NIG5489R-2</sup></i>                                                                                  | 20 h APF  | 25°C    | FV1000D |
|                                                                                                                     |                                                                                | <i>UAS-Spin:myc:RFP/+; DMef2-GAL4, UAS-Dcr2/UAS-IR-Atg12<sup>HMS01153</sup></i>                                                                                   | 20 h APF  | 25°C    | FV1000D |
|                                                                                                                     |                                                                                | <i>UAS-Spin:myc:RFP/+; DMef2-GAL4, UAS-Dcr2/UAS-IR-Stx17<sup>JF01937</sup></i>                                                                                    | 20 h APF  | 25°C    | FV1000D |
|                                                                                                                     |                                                                                | <i>UAS-Spin:myc:RFP/+; DMef2-GAL4, UAS-Dcr2/UAS-IR-SNAP29<sup>JF01883</sup></i>                                                                                   | 20 h APF  | 25°C    | FV1000D |
|                                                                                                                     |                                                                                | <i>UAS-Spin:myc:RFP/UAS-IR-Vps39<sup>HMS02438</sup>; DMef2-GAL4, UAS-Dcr2/+</i>                                                                                   | 20 h APF  | 25°C    | FV1000D |
|                                                                                                                     |                                                                                | <i>UAS-Dcr2/UAS-LacZ; DMef2-GAL4, UAS-mCh:Stx17/+</i>                                                                                                             | 20 h APF  | 25°C    | FV1000D |
|                                                                                                                     |                                                                                | <i>UAS-Dcr2/UAS-IR-Atg1; DMef2-GAL4, UAS-mCh:Stx17/+</i>                                                                                                          | 20 h APF  | 25°C    | FV1000D |
|                                                                                                                     |                                                                                | <i>UAS-Dcr2/+; DMef2-GAL4, UAS-mCh:Stx17/UAS-IR-FIP200<sup>HMS01611</sup></i>                                                                                     | 20 h APF  | 25°C    | FV1000D |
|                                                                                                                     |                                                                                | <i>UAS-Dcr2/+; DMef2-GAL4, UAS-mCh:Stx17/UAS-IR-Atg9<sup>HMS01246</sup></i>                                                                                       | 20 h APF  | 25°C    | FV1000D |
|                                                                                                                     |                                                                                | <i>UAS-Dcr2/UAS-IR-Atg18a<sup>V105366</sup>; DMef2-GAL4, UAS-mCh:Stx17/+</i>                                                                                      | 20 h APF  | 25°C    | FV1000D |
|                                                                                                                     |                                                                                | <i>UAS-Dcr2/+; DMef2-GAL4, UAS-mCh:Stx17/UAS-IR-Atg5<sup>NIG1643R-2</sup></i>                                                                                     | 20 h APF  | 25°C    | FV1000D |
|                                                                                                                     | <i>UAS-Dcr2/+; DMef2-GAL4, UAS-mCh:Stx17/UAS-IR-Atg7<sup>NIG5489R-2</sup></i>  | 20 h APF                                                                                                                                                          | 25°C      | FV1000D |         |
|                                                                                                                     | <i>UAS-Dcr2/UAS-IR-Vps39<sup>HMS02438</sup>; DMef2-GAL4, UAS-mCh:Stx17/+</i>   | 20 h APF                                                                                                                                                          | 25°C      | FV1000D |         |
|                                                                                                                     | S3E                                                                            | <i>Atg9<sup>ds1</sup>/+; DMef2-GAL4, UAS-mCh:Stx17/+</i>                                                                                                          | 20 h APF  | 25°C    | FV1000D |
|                                                                                                                     |                                                                                | <i>Atg9<sup>ds1</sup>/Atg9<sup>Gal4KO</sup>; DMef2-GAL4, UAS-mCh:Stx17/+</i>                                                                                      | 20 h APF  | 25°C    | FV1000D |
|                                                                                                                     |                                                                                | <i>Atg5<sup>5cc5</sup>Y; +/+; DMef2-GAL4, UAS-mCh:Stx17/+</i>                                                                                                     | 20 h APF  | 25°C    | FV1000D |
|                                                                                                                     | S3F                                                                            | <i>Atg9<sup>ds1</sup>/+; DMef2-GAL4, UAS-mCh:Stx17/+</i>                                                                                                          | 20 h APF  | 25°C    | -       |
|                                                                                                                     |                                                                                | <i>Atg9<sup>ds1</sup>/Atg9<sup>Gal4KO</sup>; DMef2-GAL4, UAS-mCh:Stx17/+</i>                                                                                      | 20 h APF  | 25°C    | -       |
|                                                                                                                     | S3G                                                                            | <i>w/Y; +/+; DMef2-GAL4, UAS-mCh:Stx17/+</i>                                                                                                                      | 20 h APF  | 25°C    | -       |
|                                                                                                                     |                                                                                | <i>Atg5<sup>5cc5</sup>Y; +/+; DMef2-GAL4, UAS-mCh:Stx17/+</i>                                                                                                     | 20 h APF  | 25°C    | -       |
|                                                                                                                     | S3H                                                                            | <i>UAS-Spin:myc:RFP/UAS-LacZ; DMef2-GAL4, UAS-Dcr2/+</i>                                                                                                          | 3IL       | 25°C    | FV1000D |
| <i>UAS-Spin:myc:RFP/UAS-IR-Atg1; DMef2-GAL4, UAS-Dcr2/+</i>                                                         |                                                                                | 3IL                                                                                                                                                               | 25°C      | FV1000D |         |
| <i>UAS-Spin:myc:RFP/UAS-IR-Atg18a<sup>V105366</sup>; DMef2-GAL4, UAS-Dcr2/+</i>                                     |                                                                                | 3IL                                                                                                                                                               | 25°C      | FV1000D |         |
| <i>UAS-Spin:myc:RFP/UAS-IR-Atg7<sup>HMS01358</sup>; DMef2-GAL4, UAS-Dcr2/+</i>                                      |                                                                                | 3IL                                                                                                                                                               | 25°C      | FV1000D |         |
| S3I                                                                                                                 | <i>UAS-Spin:myc:RFP/+; DMef2-GAL4, UAS-Dcr2/UAS-IR-Stx17<sup>JF01937</sup></i> | 3IL                                                                                                                                                               | 25°C      | FV1000D |         |
|                                                                                                                     | <i>Atg5<sup>5cc5</sup>Y; +/+; +/+</i>                                          | 20 h APF                                                                                                                                                          | 25°C      | H-7100  |         |
| Figure S4                                                                                                           | S4A                                                                            | <i>UAS-spin:Gamillus/UAS-mCh:Atg8a; Dmef2-GAL4, UAS-Dcr2/+</i>                                                                                                    | 12 h APF  | 25°C    | FV3000  |
|                                                                                                                     | S4B                                                                            | <i>UAS-GFP:Atg8a/UAS-Spin:myc:RFP; DMef2-GAL4/+</i>                                                                                                               | 14 h APF  | 25°C    | FV3000  |
| Figure S5                                                                                                           | S5B and C                                                                      | <i>UAS-Dcr2/UAS-LacZ; DMef2-GAL4, UAS-GCaMP6S/+</i>                                                                                                               | 4 d APF   | 25°C    | FV3000  |
|                                                                                                                     |                                                                                | <i>UAS-Dcr2/+; DMef2-GAL4, UAS-GCaMP6S/UAS-IR-Atg5<sup>NIG1643R-2</sup></i>                                                                                       | 4 d APF   | 25°C    | FV3000  |
|                                                                                                                     |                                                                                | <i>UAS-Dcr2/UAS-IR-Atg18a<sup>V105366</sup>; DMef2-GAL4, UAS-GCaMP6S/+</i>                                                                                        | 4 d APF   | 25°C    | FV3000  |
| Figure S6                                                                                                           | S6B                                                                            | <i>w/Y; +/+; +/+</i>                                                                                                                                              | 4 d APF   | 25°C    | H-7100  |
|                                                                                                                     | S6C                                                                            | <i>Atg5<sup>5cc5</sup>Y; +/+; +/+</i>                                                                                                                             | 4 d APF   | 25°C    | H-7100  |
|                                                                                                                     | S6D                                                                            | <i>w/Y; Atg9<sup>ds1</sup>/Atg9<sup>Gal4KO</sup>; +/+</i>                                                                                                         | 4 d APF   | 25°C    | H-7100  |
|                                                                                                                     | S6E                                                                            | <i>Atg5<sup>5cc5</sup>Y; +/+; +/+</i>                                                                                                                             | 4 d APF   | 25°C    | H-7100  |
|                                                                                                                     | S6F                                                                            | <i>UAS-IR-Spin<sup>NIG8428R-4</sup>/+; DMef2-GAL4, UAS-Dcr2/+</i>                                                                                                 | 4 d APF   | 25°C    | H-7100  |
|                                                                                                                     | S6G                                                                            | <i>UAS-IR-Trpm1<sup>HMS02818</sup>/+; DMef2-GAL4, UAS-Dcr2/+</i>                                                                                                  | 4 d APF   | 25°C    | H-7100  |
